# Supplementary material
Source: PubMed Central journal article supplement (PMC6741497)
Supplement: jin-0006-0530-s01.pdf [file jin-0006-0530-s01.pdf]

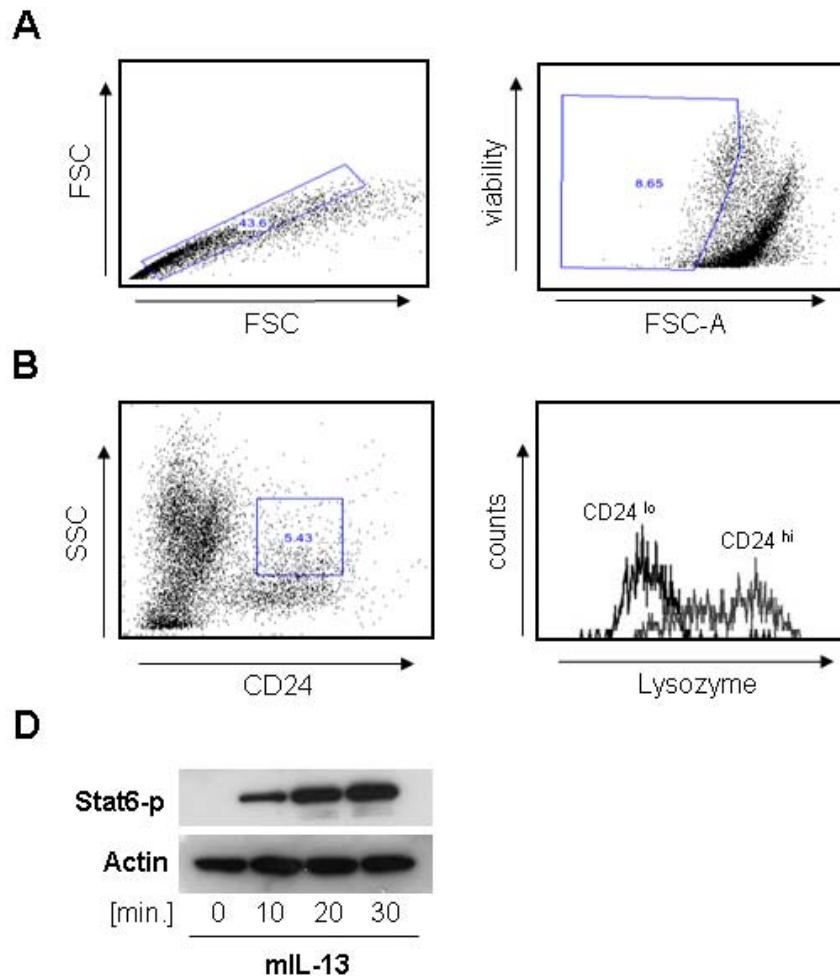

**Suppl. Fig. 1. (A-C)** Flow cytometric analysis of isolated small intestinal crypt Paneth cells. **(A)** Isolated small intestinal crypt epithelial cells were trypsinized, washed and stained for CD24 (right panel) or isotype control (left panel). **(B)** Small intestinal crypt epithelial cells were stained for CD45 and CD24 (right panel) or the respective isotype control (left panel). **(C)** Small intestinal crypt epithelial cells were stained for CD24 and lysozyme. CD24<sup>hi</sup> cells but not CD24<sup>lo</sup> cells showed lysozyme staining. **(D)** Immunoblot showing Stat6 phosphorylation of intestinal epithelial m-IC<sub>c12</sub> cells upon stimulation with IL-13 (10 ng/mL) for the indicated time (min).
